# Supplementary material for: Milk: An Effective Recovery Drink for Female Athletes
Source: PubMed Central journal article supplement (PMC5852804; doi:10.3390/nu10020228), 2018-02-17
Supplement: nutrients-10-00228-s001.pdf [file nutrients-10-00228-s001.pdf]

SUPPLEMENTARY MATERIAL

Table S1: Within-group effects over time for dependent variables

| Variable                            | Timeframe | Mean effect, $\pm$ x/ $\div$ 90% CI <sup>a</sup> | Qualitative inference <sup>b</sup> |
|-------------------------------------|-----------|--------------------------------------------------|------------------------------------|
| <b>Peak Torque 60°/s Extension</b>  |           |                                                  |                                    |
| MILK                                | B-24      | -8.2, $\pm$ 2.7                                  | Most likely lower                  |
|                                     | B-48      | -8.5, $\pm$ 2.8                                  | Most likely lower                  |
|                                     | B-72      | -4.1, $\pm$ 4.8                                  | Most likely lower                  |
| CHO                                 | B-24      | -13.4, $\pm$ 6.0                                 | Most likely lower                  |
|                                     | B-48      | -12.5, $\pm$ 7.0                                 | Very likely lower                  |
|                                     | B-72      | -10.6, $\pm$ 7.8                                 | Very likely lower                  |
| <b>Peak Torque 60°/s Flexion</b>    |           |                                                  |                                    |
| MILK                                | B-24      | -5.2, $\pm$ 8.8                                  | Possibly lower                     |
|                                     | B-48      | -10.4, $\pm$ 9.1                                 | Likely lower                       |
|                                     | B-72      | -3.3, $\pm$ 7.6                                  | Unclear                            |
| CHO                                 | B-24      | -14.2, $\pm$ 7.1                                 | Very likely lower                  |
|                                     | B-48      | -13.3, $\pm$ 5.4                                 | Very likely lower                  |
|                                     | B-72      | -12.2, $\pm$ 7.8                                 | Very likely lower                  |
| <b>Peak Torque 180°/s Extension</b> |           |                                                  |                                    |
| MILK                                | B-24      | -7.6, $\pm$ 5.2                                  | Likely lower                       |
|                                     | B-48      | -5.8, $\pm$ 7.6                                  | Likely lower                       |
|                                     | B-72      | -0.5, $\pm$ 6.6                                  | Unclear                            |
| CHO                                 | B-24      | -12.7, $\pm$ 2.7                                 | Most likely lower                  |
|                                     | B-48      | -14.5, $\pm$ 7.4                                 | Very likely lower                  |
|                                     | B-72      | -8.8, $\pm$ 2.3                                  | Most likely lower                  |
| <b>Peak Torque 180°/s Flexion</b>   |           |                                                  |                                    |
| MILK                                | B-24      | -2.8, $\pm$ 8.0                                  | Possibly lower                     |
|                                     | B-48      | -4.3, $\pm$ 9.1                                  | Possibly lower                     |
|                                     | B-72      | -1.6, $\pm$ 9.3                                  | Unclear                            |
| CHO                                 | B-24      | -14.0, $\pm$ 7.7                                 | Very likely lower                  |
|                                     | B-48      | -11.7, $\pm$ 13.2                                | Likely lower                       |
|                                     | B-72      | -10.8, $\pm$ 6.1                                 | Very likely lower                  |
| <b>CMJ</b>                          |           |                                                  |                                    |
| MILK                                | B-24      | -1.2, $\pm$ 3.4                                  | Unclear                            |
|                                     | B-48      | -1.9, $\pm$ 3.1                                  | Possibly lower                     |
|                                     | B-72      | -0.6, $\pm$ 1.4                                  | Very likely trivial                |
| CHO                                 | B-24      | -10.6, $\pm$ 4.2                                 | Most likely lower                  |
|                                     | B-48      | -9.9, $\pm$ 5.0                                  | Very likely lower                  |
|                                     | B-72      | -6.6, $\pm$ 4.0                                  | Very likely lower                  |

| <b>RSI</b>             |      |                        |                       |
|------------------------|------|------------------------|-----------------------|
| MILK                   | B-24 | -7.0, $\pm$ 5.2        | Likely lower          |
|                        | B-48 | -12.8, $\pm$ 7.0       | Very likely lower     |
|                        | B-72 | -5.3, $\pm$ 8.0        | Possibly lower        |
| CHO                    | B-24 | -10.8, $\pm$ 9.0       | Likely lower          |
|                        | B-48 | -14.2, $\pm$ 10.8      | Likely lower          |
|                        | B-72 | -10.8, $\pm$ 7.8       | Likely lower          |
| <b>5m sprint</b>       |      |                        |                       |
| MILK                   | B-24 | -1.7, $\pm$ 2.4        | Possibly lower*       |
|                        | B-48 | 0.4, $\pm$ 4.2         | Unclear               |
|                        | B-72 | -0.6, $\pm$ 3.3        | Unclear               |
| CHO                    | B-24 | -4.8, $\pm$ 3.2        | Very likely lower*    |
|                        | B-48 | -3.1, $\pm$ 2.9        | Likely lower*         |
|                        | B-72 | -1.4, $\pm$ 2.0        | Possibly lower*       |
| <b>10m sprint</b>      |      |                        |                       |
| MILK                   | B-24 | -1.2, $\pm$ 2.1        | Possibly lower*       |
|                        | B-48 | -0.1, $\pm$ 2.7        | Unclear               |
|                        | B-72 | -0.3, $\pm$ 3.2        | Unclear               |
| CHO                    | B-24 | -2.4, $\pm$ 3.0        | Likely lower*         |
|                        | B-48 | -1.9, $\pm$ 2.8        | Unclear               |
|                        | B-72 | -0.5, $\pm$ 2.8        | Unclear               |
| <b>20m sprint</b>      |      |                        |                       |
| MILK                   | B-24 | -1.3, $\pm$ 1.4        | Possibly lower*       |
|                        | B-48 | -0.6, $\pm$ 1.3        | Possibly lower*       |
|                        | B-72 | -0.6, $\pm$ 1.4        | Possibly lower*       |
| CHO                    | B-24 | -2.7, $\pm$ 2.3        | Likely lower*         |
|                        | B-48 | -2.2, $\pm$ 2.8        | Unclear               |
|                        | B-72 | -0.1, $\pm$ 1.7        | Unclear               |
| <b>RFD</b>             |      |                        |                       |
| MILK                   | B-24 | -11.1, $\pm$ 11.9      | Possibly lower        |
|                        | B-48 | -20.0, $\pm$ 9.9       | Very likely lower     |
|                        | B-72 | -9.9, $\pm$ 14.5       | Possibly lower        |
| CHO                    | B-24 | -23.0, $\pm$ 9.3       | Most likely lower     |
|                        | B-48 | -24.7, $\pm$ 12.7      | Very likely lower     |
|                        | B-72 | -18.5, $\pm$ 16.4      | Likely lower          |
| <b>Creatine Kinase</b> |      |                        |                       |
| MILK                   | B-24 | 2.2, $\times/\div$ 1.4 | Most likely increased |
|                        | B-48 | 1.8, $\times/\div$ 1.5 | Very likely increased |
|                        | B-72 | 1.6, $\times/\div$ 1.5 | Likely increased      |
| CHO                    | B-24 | 2.1, $\times/\div$ 1.3 | Most likely increased |
|                        | B-48 | 1.4, $\times/\div$ 1.5 | Likely increased      |
|                        | B-72 | 1.1, $\times/\div$ 1.4 | Unclear               |

| <b>hsCRP</b>     |      |              |                      |
|------------------|------|--------------|----------------------|
| MILK             | B-24 | 1.2, x/± 1.8 | Unclear              |
|                  | B-48 | 1.2, x/± 1.7 | Unclear              |
|                  | B-72 | 1.1, x/± 1.8 | Unclear              |
| CHO              | B-24 | 1.0, x/± 1.2 | Unclear              |
|                  | B-48 | 0.9, x/± 1.2 | Likely lower         |
|                  | B-72 | 0.8, x/± 1.3 | Possibly lower       |
| <b>Soreness</b>  |      |              |                      |
| MILK             | B-24 | 5.3, ±1.6    | Most likely increase |
|                  | B-48 | 4.3, ±1.5    | Most likely increase |
|                  | B-72 | 2.0, ±0.7    | Most likely increase |
| CHO              | B-24 | 5.8, ±1.3    | Most likely increase |
|                  | B-48 | 4.8, ±1.1    | Most likely increase |
|                  | B-72 | 2.6, ±0.8    | Most likely increase |
| <b>Tiredness</b> |      |              |                      |
| MILK             | B-24 | 4.3, ±1.1    | Most likely increase |
|                  | B-48 | 3.8, ±1.0    | Most likely increase |
|                  | B-72 | 1.8, ±0.8    | Very likely increase |
| CHO              | B-24 | 5.1, ±0.9    | Most likely increase |
|                  | B-48 | 3.8, ±1.2    | Most likely increase |
|                  | B-72 | 2.3, ±0.8    | Most likely increase |
| <b>DALDA</b>     |      |              |                      |
| MILK             | B-24 | 3.4, ± 1.2   | Most likely increase |
|                  | B-48 | 3.9, ±1.7    | Most likely increase |
|                  | B-72 | 2.8, ±1.9    | Very likely increase |
| CHO              | B-24 | 4.7, ±1.7    | Most likely increase |
|                  | B-48 | 4.9, ±2.2    | Most likely increase |
|                  | B-72 | 3.2, ±1.6    | Very likely increase |

<sup>a</sup>± 90% CI: add and subtract this number to the mean effect to obtain the 90% confidence intervals for the true difference; <sup>b</sup>Qualitative Inference represents the likelihood that the true value will have the observed magnitude; \*lower refers to reduced performance
